# Supplementary material for: Models of the putative antimony(v)–diolate motifs in antileishmanial pentavalent antimonial drugs
Source: Royal Society of Chemistry journal article supplement (doi:10.1039/d3dt01623d), 2023-01-01
Supplement: d3dt01623d1.pdf [file d3dt01623d1.pdf]

## **Electronic Supplementary Information for**

# **Models of the putative antimony(V)-diolate motifs in antileishmanial pentavalent antimonial drugs**

*Brent Lindquist-Kleissler and Timothy C. Johnstone\**

Department of Chemistry and Biochemistry, University of California Santa Cruz, Santa Cruz,  
California 95064, United States.

\* Correspondence to: [johnstone@ucsc.edu](mailto:johnstone@ucsc.edu)

## CONTENTS

|                                                                                                  | <b>Page</b> |
|--------------------------------------------------------------------------------------------------|-------------|
| Table S1 – Refinement details for crystal structures                                             | S3          |
| Figure S1 – Crystal structure of hydrolysis decomposition product                                | S4          |
| Figure S2 – Crystal structure of Sb(tol) <sub>3</sub>                                            | S4          |
| Figure S3 – Overlays of crystal structures of <b>1-6</b>                                         | S5          |
| Figure S4 – Stacked <sup>1</sup> H NMR spectra of free butanediols, <b>2</b> , and <b>4</b>      | S5          |
| Figure S5 – Stacked <sup>1</sup> H NMR spectra of free ( <i>S</i> )-1,2-propanediol and <b>6</b> | S6          |
| Figure S6 – NMR spectra of <b>1</b>                                                              | S7          |
| Figure S7 – NMR spectra of <b>2</b>                                                              | S8          |
| Figure S8 – NMR spectra of <b>3</b>                                                              | S9          |
| Figure S9 – NMR spectra of <b>4</b>                                                              | S10         |
| Figure S10 – NMR spectra of <b>5</b>                                                             | S11         |
| Figure S11 – NMR spectra of <b>6</b>                                                             | S12         |

**Table S1.** Refinement Details for the Crystal Structures of Sb(tol)<sub>3</sub> and [(tol)<sub>3</sub>Sb(μ-C<sub>4</sub>H<sub>8</sub>O<sub>2</sub>)<sub>2</sub>O].

|                                         | <b>Sb(tol)<sub>3</sub></b>         | <b>[(tol)<sub>3</sub>Sb(μ-C<sub>4</sub>H<sub>8</sub>O<sub>2</sub>)<sub>2</sub>O]</b> |
|-----------------------------------------|------------------------------------|--------------------------------------------------------------------------------------|
| Formula                                 | C <sub>21</sub> H <sub>21</sub> Sb | C <sub>36</sub> H <sub>44</sub> O <sub>5</sub> Sb <sub>2</sub>                       |
| FW                                      | 395.13                             | 800.21                                                                               |
| T (K)                                   | 101.1(6)                           | 102(2)                                                                               |
| λ (Å)                                   | 1.54184                            | 1.54184                                                                              |
| Crystal System                          | Trigonal                           | Orthorhombic                                                                         |
| Space group                             | <i>R</i> $\bar{3}$                 | <i>P</i> 2 <sub>1</sub> 2 <sub>1</sub> 2 <sub>1</sub>                                |
| <i>a</i> (Å)                            | 12.6758(3)                         | 12.17550(10)                                                                         |
| <i>b</i> (Å)                            |                                    | 13.5809(2)                                                                           |
| <i>c</i> (Å)                            | 19.8058(4)                         | 20.6690(3)                                                                           |
| Volume (Å <sup>3</sup> )                | 2755.96(14)                        | 3417.71(8)                                                                           |
| <i>Z</i>                                | 6                                  | 4                                                                                    |
| ρ <sub>calc</sub> (Mg/m <sup>3</sup> )  | 1.428                              | 1.555                                                                                |
| Size (mm <sup>3</sup> )                 | 0.21×0.14×0.04                     | 0.12×0.06×0.05                                                                       |
| θ range (°)                             | 4.605-67.036                       | 3.895-67.684                                                                         |
| Total data                              | 6111                               | 51012                                                                                |
| Unique data                             | 1099                               | 7095                                                                                 |
| Parameters                              | 68                                 | 397                                                                                  |
| Completeness                            | 100.0%                             | 100.0%                                                                               |
| <i>R</i> <sub>int</sub>                 | 4.87%                              | 5.45%                                                                                |
| <i>R</i> <sub>1</sub> ( <i>I</i> > 2σ)  | 2.11%                              | 3.25%                                                                                |
| <i>R</i> <sub>1</sub> (all data)        | 2.16%                              | 3.39%                                                                                |
| <i>wR</i> <sub>2</sub> ( <i>I</i> > 2σ) | 5.41%                              | 8.52%                                                                                |
| <i>wR</i> <sub>2</sub> (all data)       | 5.43%                              | 8.64%                                                                                |
| <i>S</i>                                | 1.098                              | 1.078                                                                                |
| Flack <i>x</i>                          | —                                  | -0.015(9)                                                                            |

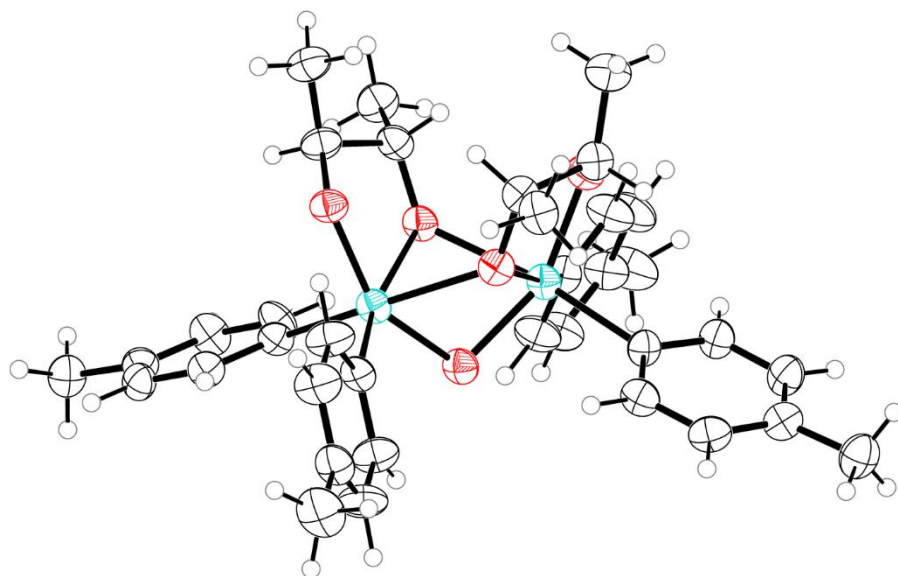

**Figure S1.** Thermal ellipsoid plot (50% probability, H atoms as spheres of arbitrary radius) of a hydrolysis decomposition product observed to form during the synthesis of butanediolate complexes. Color code: Sb teal, O red, C black, H white.

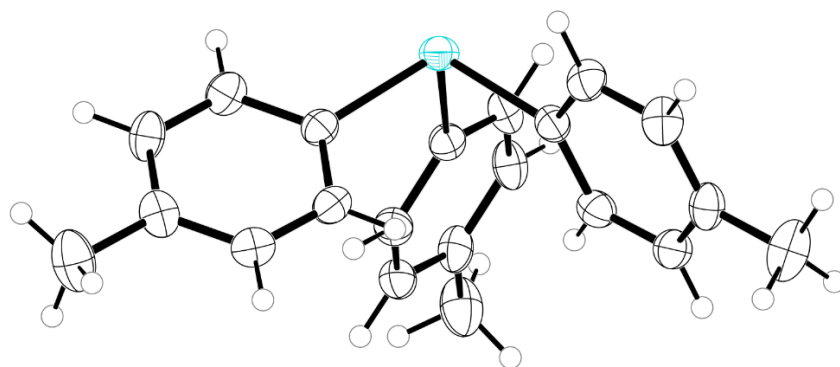

**Figure S2.** Thermal ellipsoid plot (50% probability, H atoms as spheres of arbitrary radius) of Sb(tol)<sub>3</sub>. Color code: Sb teal, C black, H white.

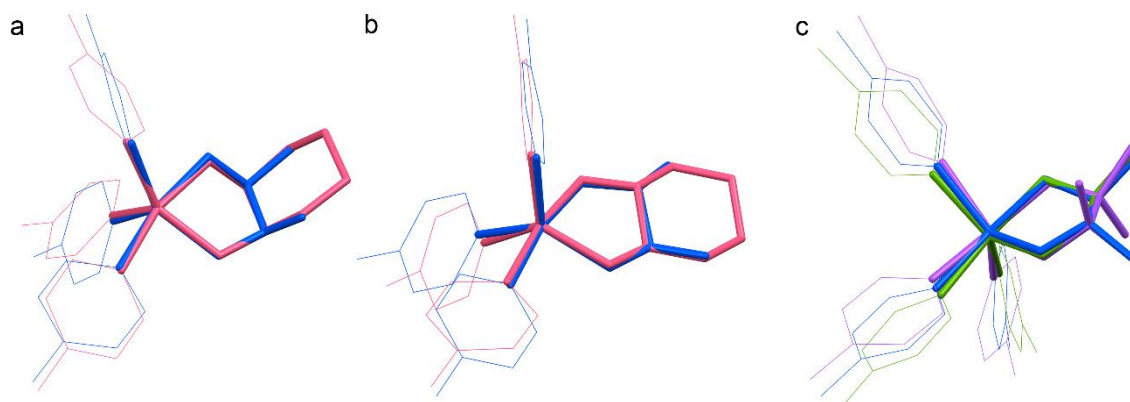

**Figure S3.** Overlays of: a) **2** (blue) and **3** (pink). b) **4** (blue) and **5** (pink). c) **1** (purple), **4** (blue), and **6** (green).

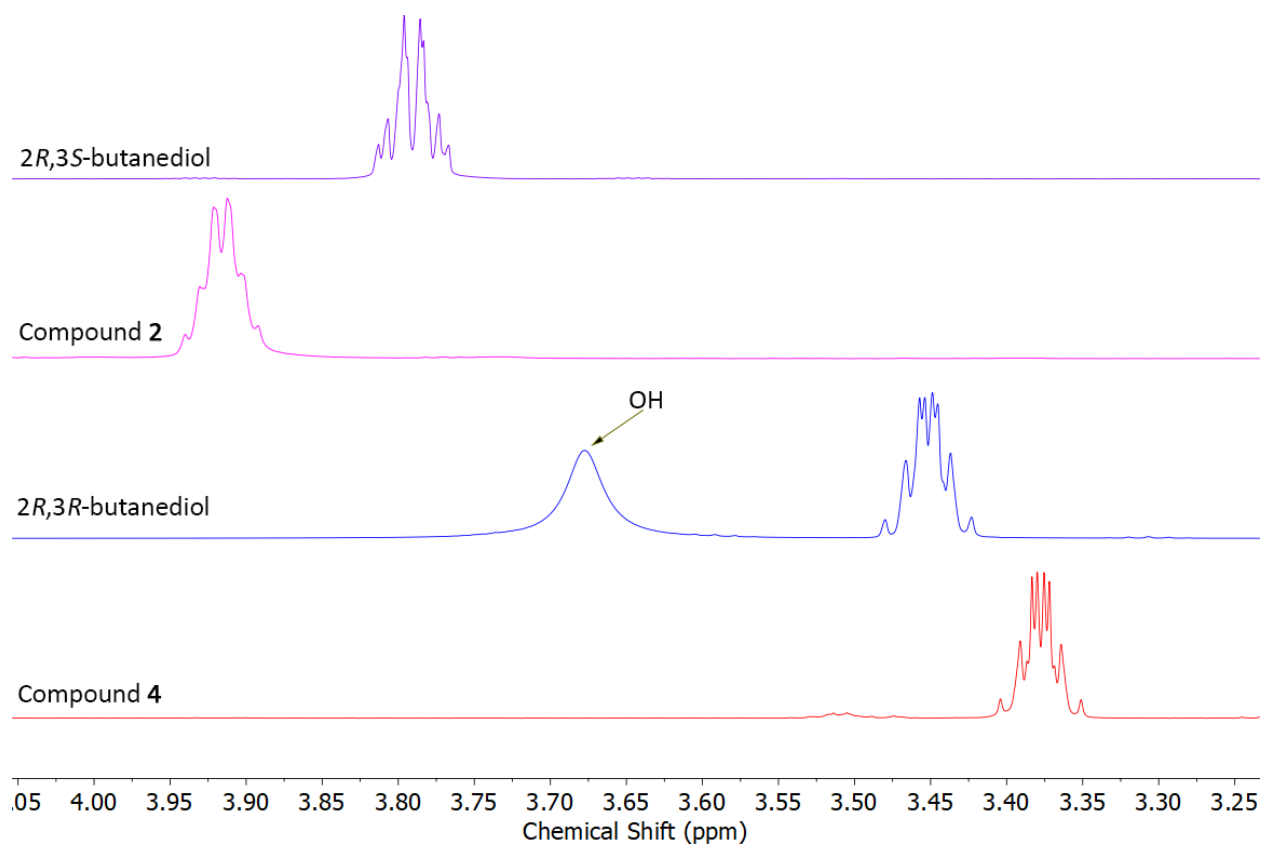

**Figure S4.** Stacked  $^1\text{H}$  NMR spectra showing shift in backbone CH resonances. Color code: unbound  $2R,3S$ -butanediol purple, compound **2** pink, unbound  $2R,3R$ -butanediol blue, compound **4** red.

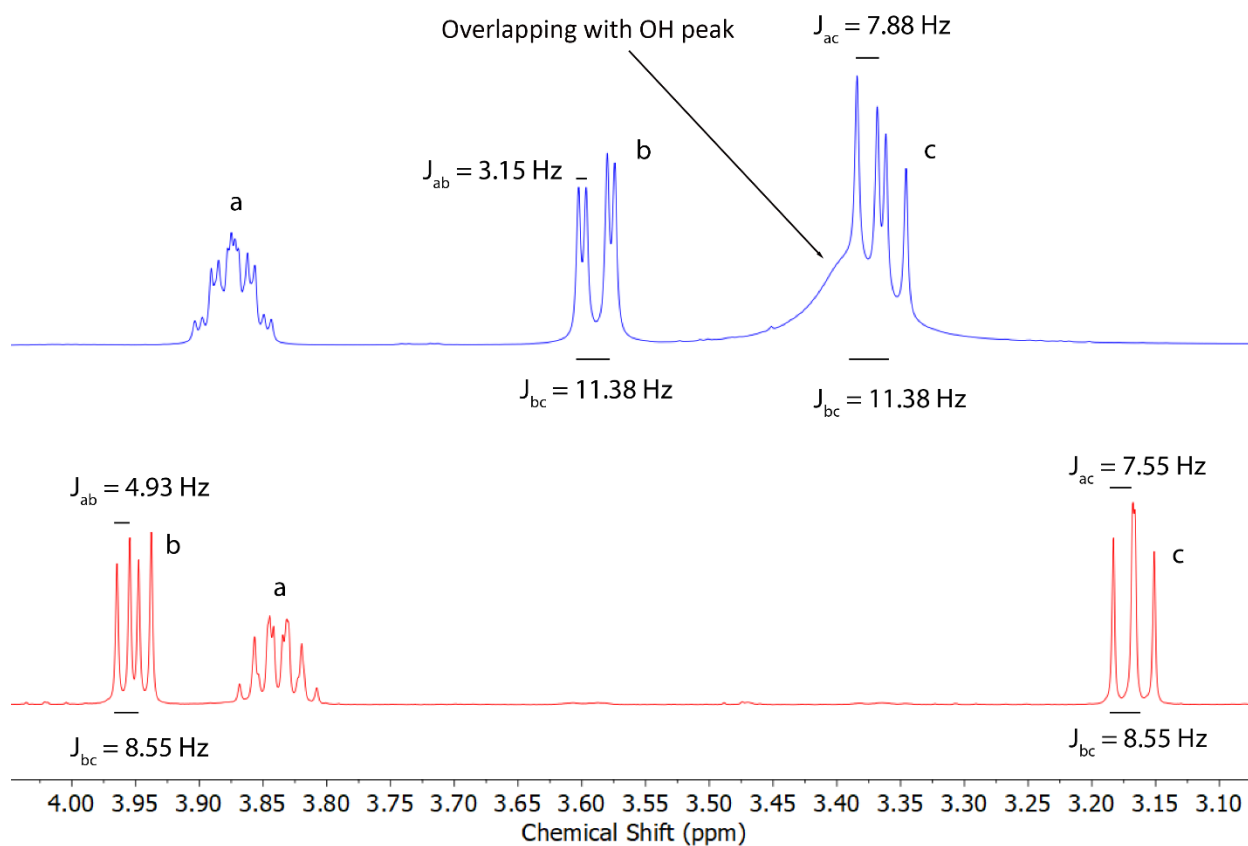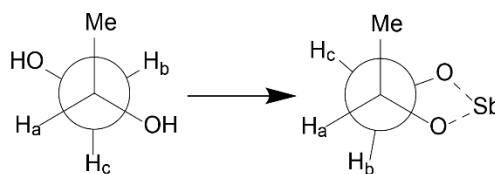

**Figure S5.** *Top (blue):*  $^1\text{H}$  NMR spectrum of free (*S*)-1,2-propanediol. Peaks are arbitrarily labeled based on the labelling scheme used for the Newman projections. *Middle (red):*  $^1\text{H}$  NMR spectrum of **6**. *Bottom:* Newman projections displaying conformational change of (*S*)-1,2-propanediol upon binding to Sb.

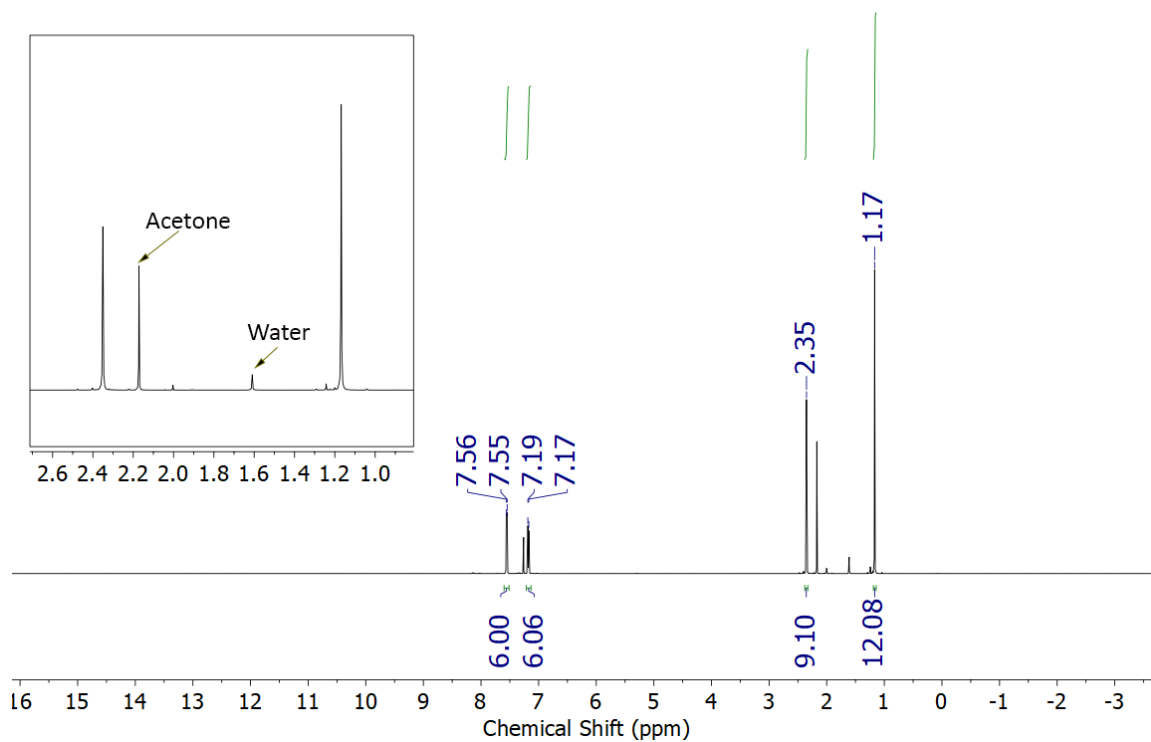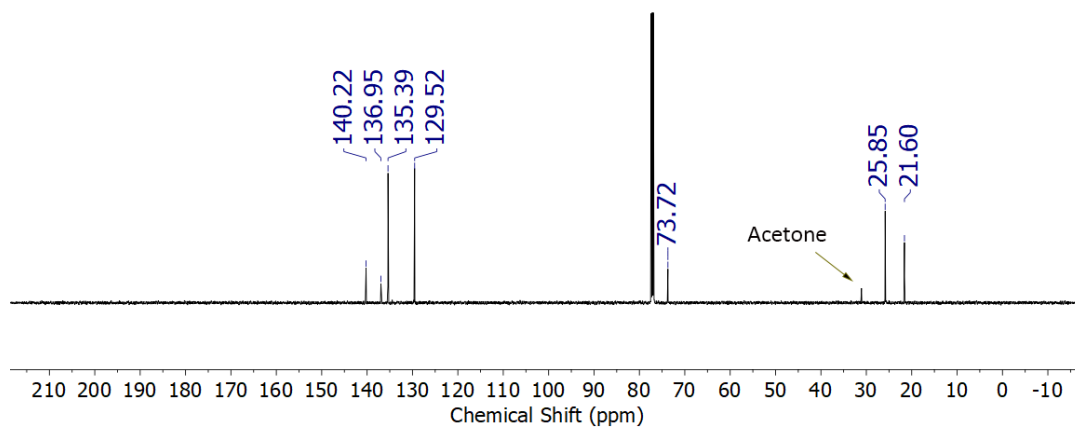

**Figure S6.** *Top:* <sup>1</sup>H NMR (500 MHz, CDCl<sub>3</sub>) spectrum of **1**. *Bottom:* <sup>13</sup>C{<sup>1</sup>H} NMR (126 MHz, CDCl<sub>3</sub>) spectrum of **1**.

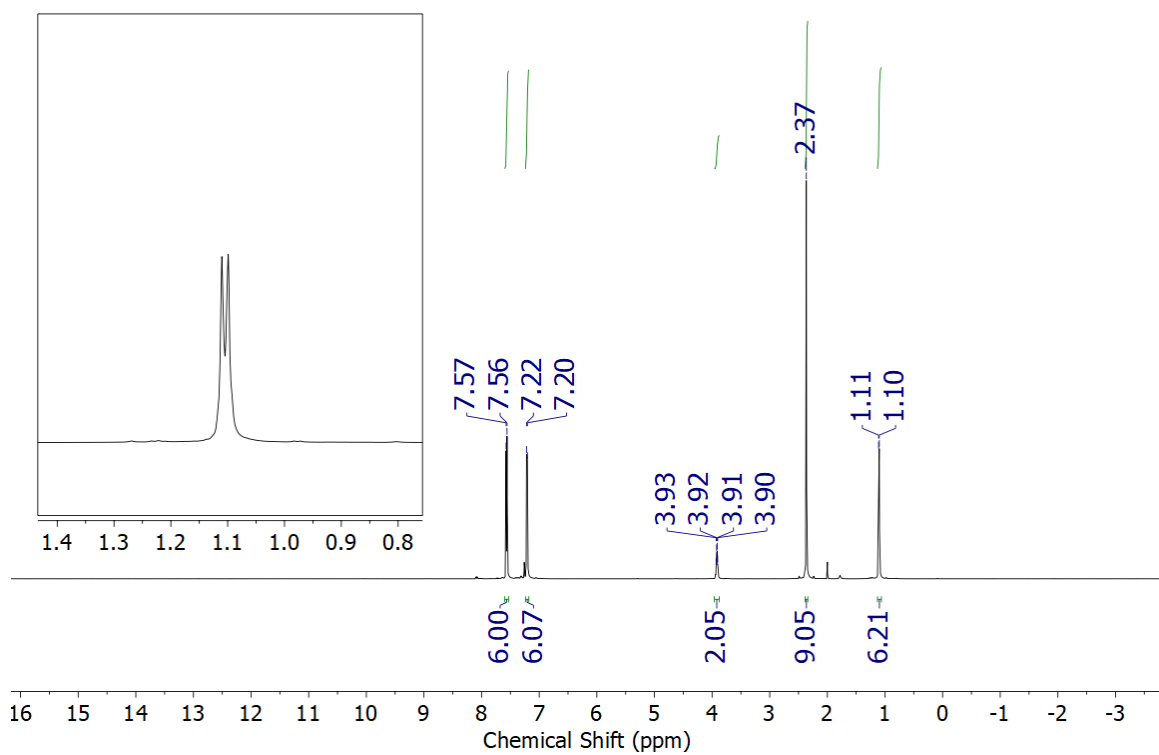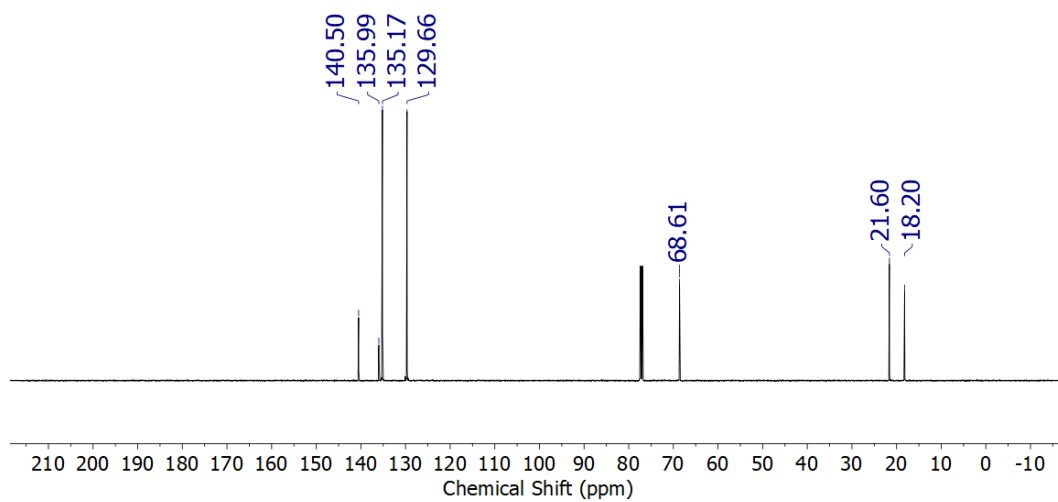

**Figure S7.** *Top:*  $^1\text{H}$  NMR (500 MHz,  $\text{CDCl}_3$ ) spectrum of **2**. *Bottom:*  $^{13}\text{C}\{^1\text{H}\}$  NMR (126 MHz,  $\text{CDCl}_3$ ) spectrum of **2**.



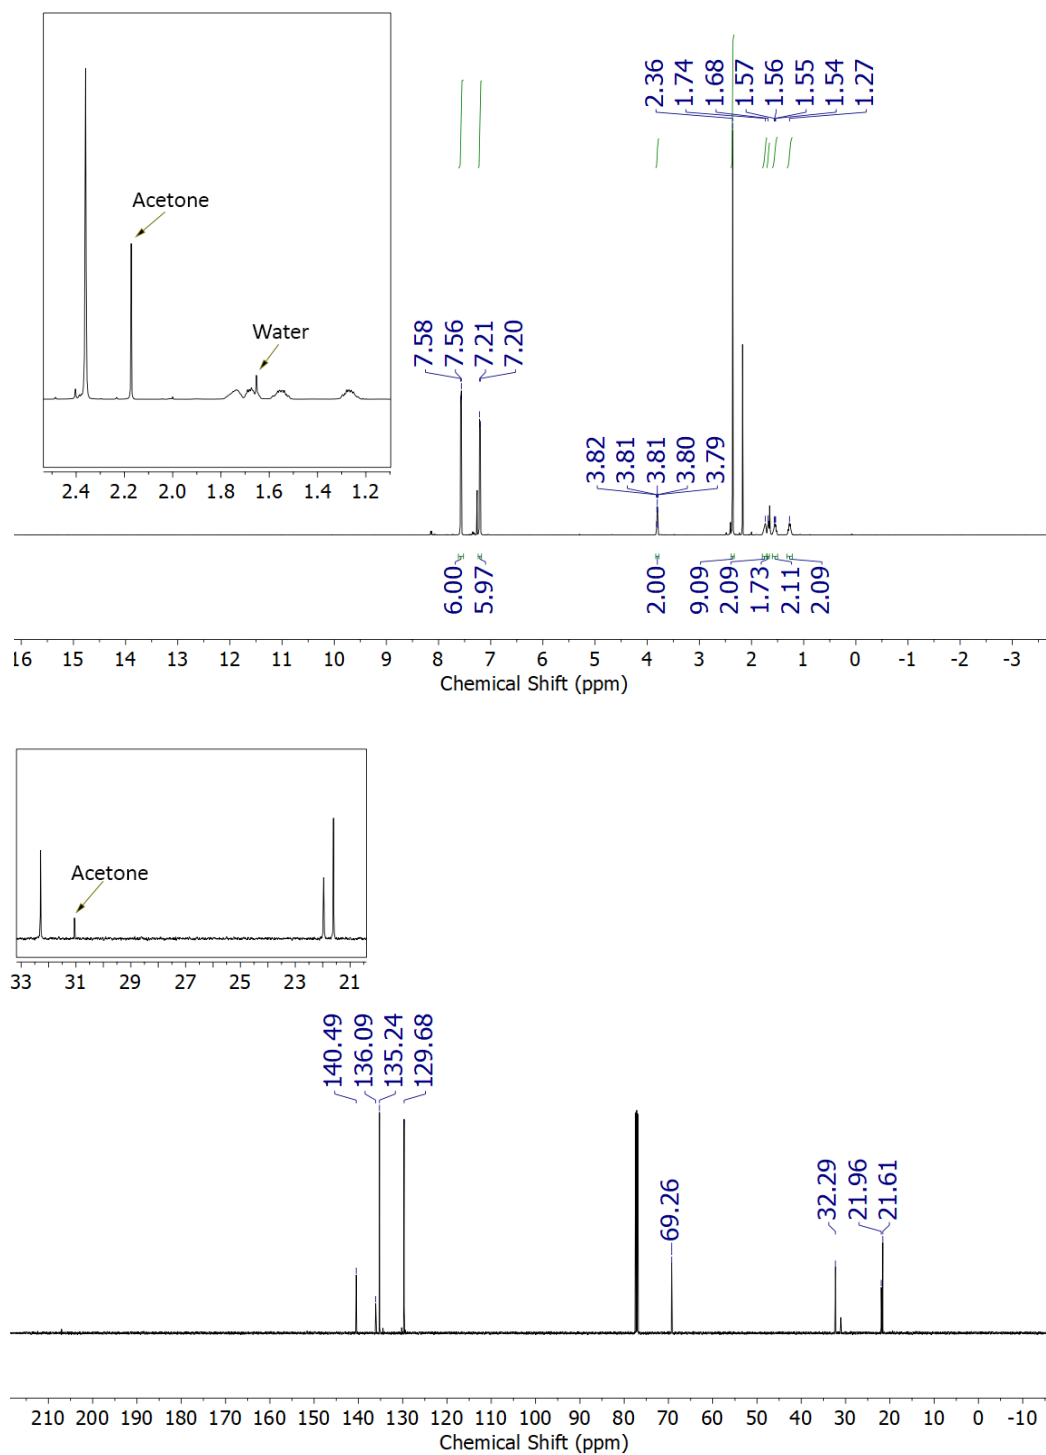

**Figure S8.** *Top:*  $^1\text{H}$  NMR (500 MHz,  $\text{CDCl}_3$ ) spectrum of **3**. *Bottom:*  $^{13}\text{C}\{^1\text{H}\}$  NMR (126 MHz,  $\text{CDCl}_3$ ) spectrum of **3**.

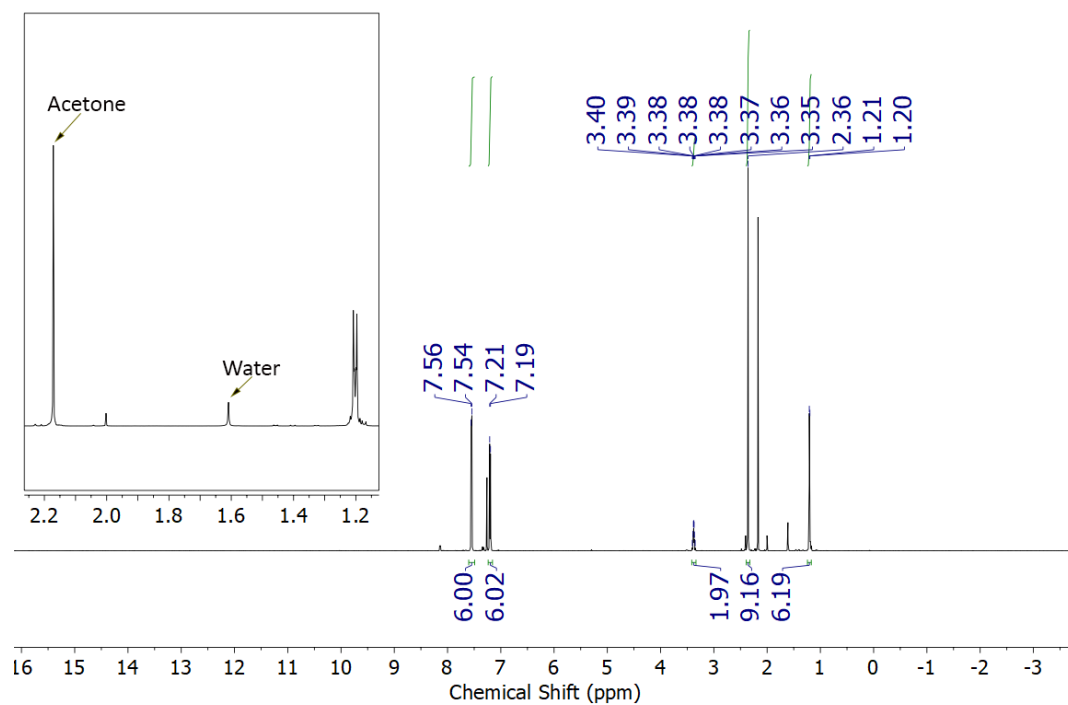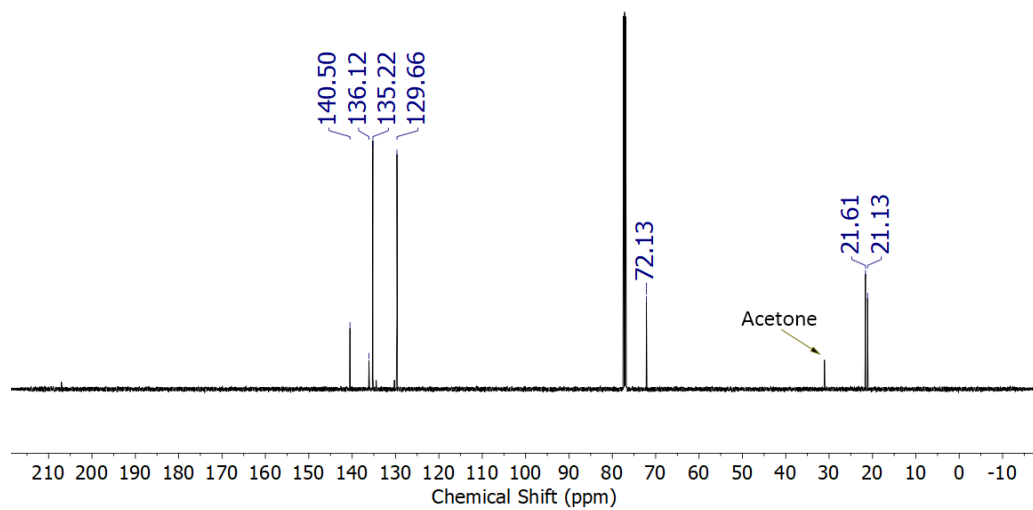

**Figure S9.** *Top:*  $^1\text{H}$  NMR (500 MHz,  $\text{CDCl}_3$ ) spectrum of **4**. *Bottom:*  $^{13}\text{C}\{^1\text{H}\}$  NMR (126 MHz,  $\text{CDCl}_3$ ) spectrum of **4**.

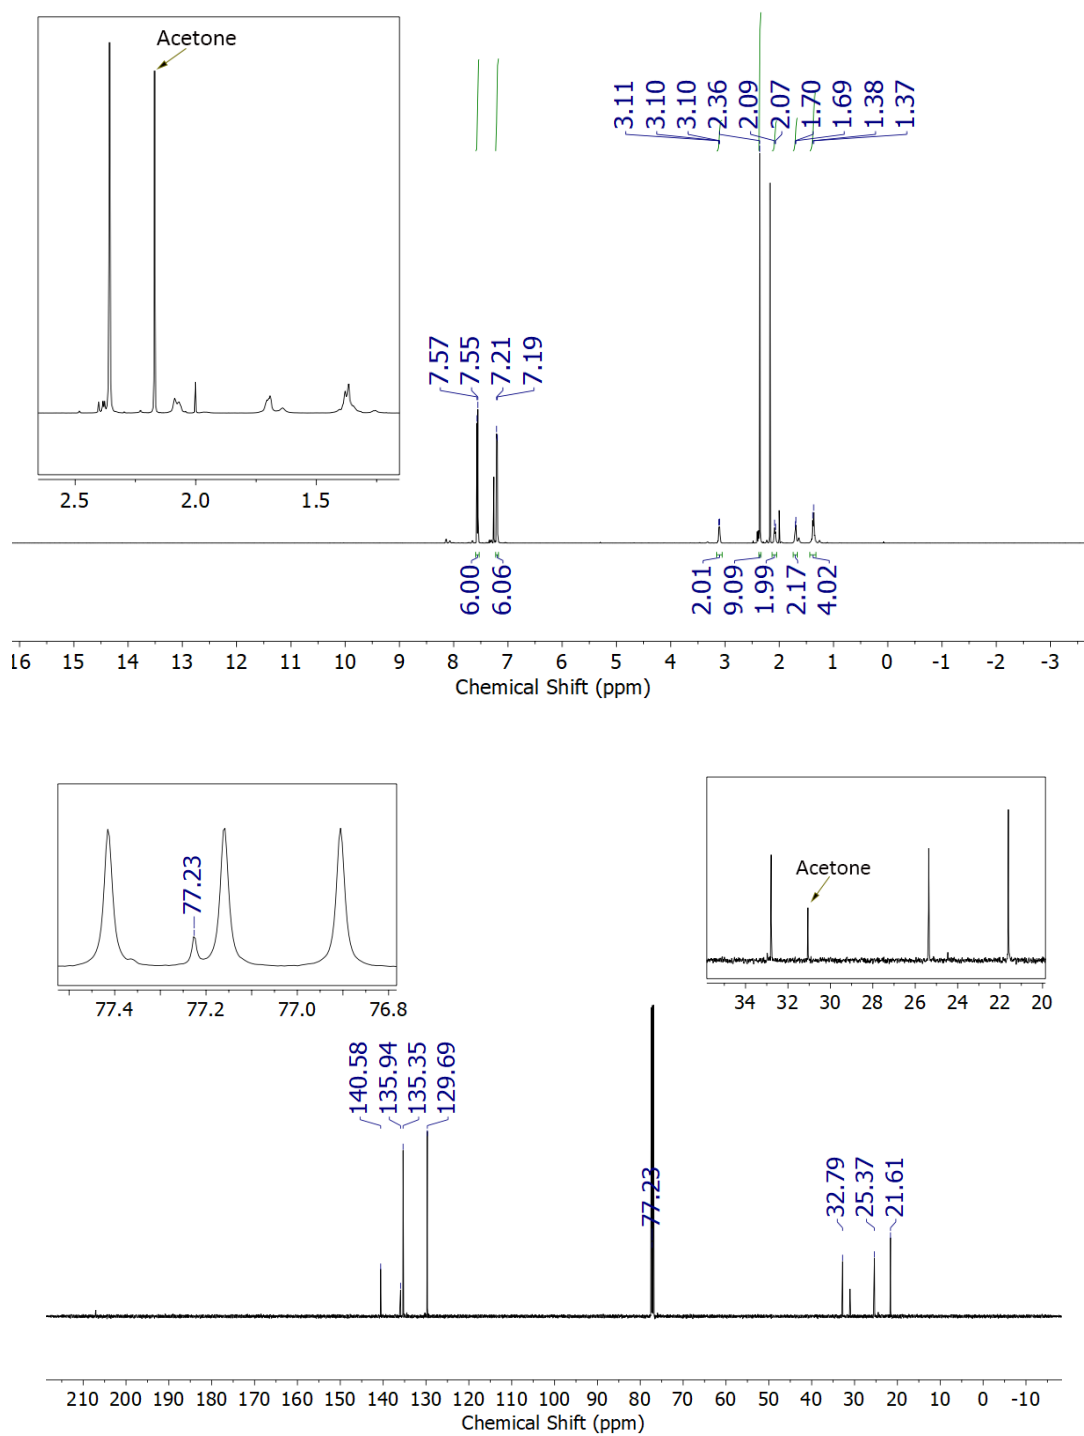

**Figure S10.** Top:  $^1\text{H}$  NMR (500 MHz,  $\text{CDCl}_3$ ) spectrum of **5**. Bottom:  $^{13}\text{C}$   $\{^1\text{H}\}$  NMR (126 MHz,  $\text{CDCl}_3$ ) spectrum of **5**.

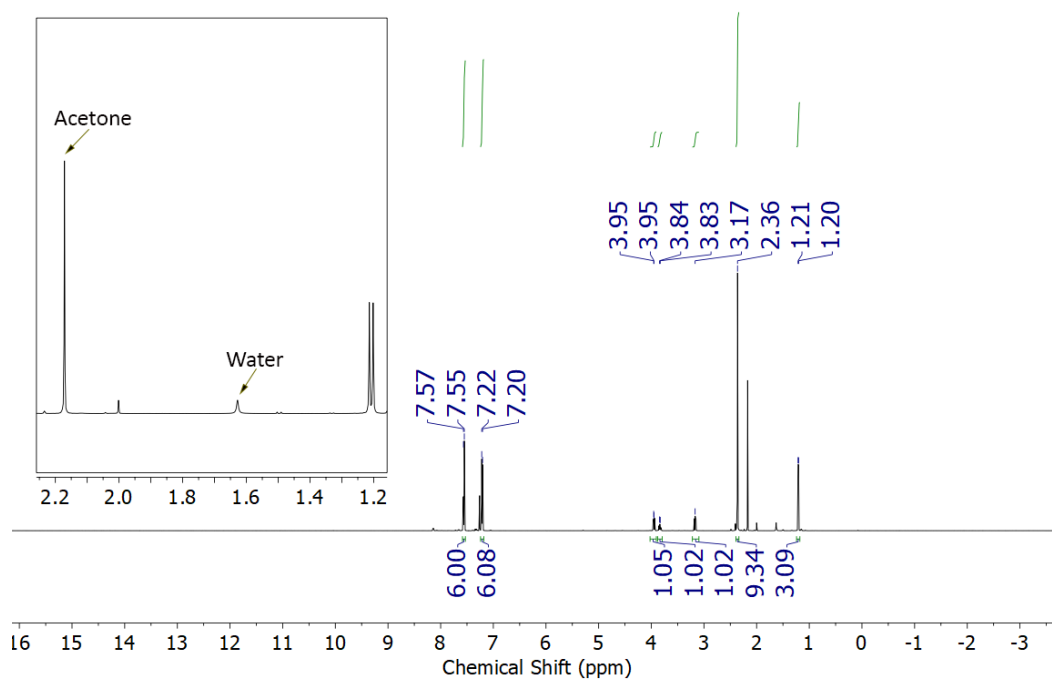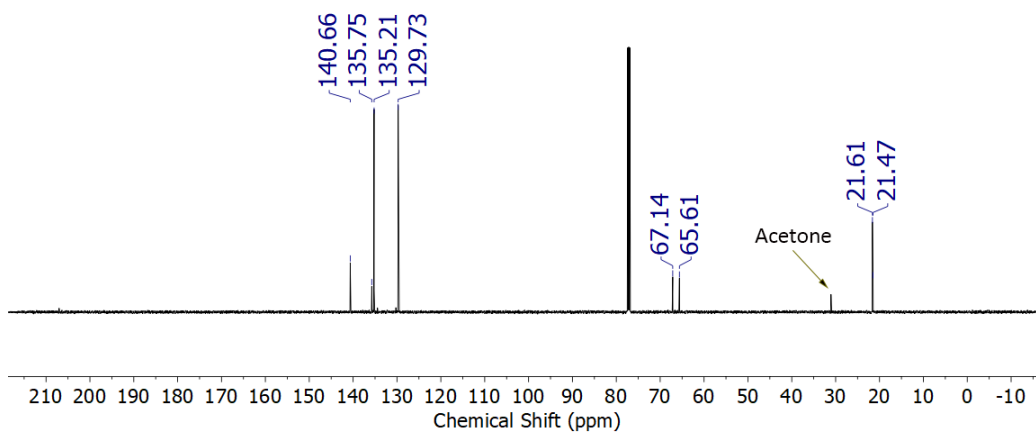

**Figure S11.** *Top:* <sup>1</sup>H NMR (500 MHz, CDCl<sub>3</sub>) spectrum of **6**. *Bottom:* <sup>13</sup>C{<sup>1</sup>H} NMR (126 MHz, CDCl<sub>3</sub>) spectrum of **6**.
